# Supplementary material for: High-throughput computational materials screening of transition metal peroxides
Source: Royal Society of Chemistry journal article supplement (doi:10.1039/d3cp03968d), 2023-11-29
Supplement: d3cp03968d1.pdf [file d3cp03968d1.pdf]

## **Supplementary Information for**

### **High-throughput computational materials screening of transition metal peroxides**

Yin-Hui Peng,<sup>1</sup> Chang-Chun He,<sup>1</sup> Yu-Jun Zhao,<sup>1</sup> and Xiao-Bao Yang<sup>1,a</sup>

*School of Physics and Optoelectronics, South China University of Technology,  
Guangzhou 510640, China. E-mail: scxbyang@scut.edu.cn*

| Phase                                        | Lattice Parameters (Å)                                                        | Atomic coordinates (fractional) |
|----------------------------------------------|-------------------------------------------------------------------------------|---------------------------------|
| ScO <sub>2</sub> [ <i>P2<sub>1</sub>/c</i> ] | a = 3.724, b = 5.838, c = 5.902<br>$\alpha = 92.718, \beta = \gamma = 90.000$ | Sc 0.028 0.224 0.839            |
|                                              |                                                                               | O1 0.460 0.859 0.317            |
|                                              |                                                                               | O2 0.845 0.548 0.440            |
| TiO <sub>3</sub> [ <i>Pmmn</i> ]             | a = 2.948, b = 3.948, c = 7.113<br>$\alpha = \beta = \gamma = 90.000$         | Ti 0.000 0.500 0.350            |
|                                              |                                                                               | O1 0.500 0.500 0.545            |
|                                              |                                                                               | O2 0.000 0.184 0.818            |

**Table S1.** Detailed structural information of the ScO<sub>2</sub> and TiO<sub>3</sub>.

| Phase                                        | Atom | Charge | $\sigma(e)$ |
|----------------------------------------------|------|--------|-------------|
| ScO <sub>2</sub> [ <i>P2<sub>1</sub>/c</i> ] | Sc   | 1.22   | -1.78       |
|                                              | O1   | 7.16   | 1.16        |
|                                              | O2   | 6.62   | 0.62        |
| TiO <sub>3</sub> [ <i>Pmmn</i> ]             | Ti   | 2.12   | -1.88       |
|                                              | O1   | 6.98   | 0.98        |
|                                              | O2   | 6.45   | 0.45        |

**Table S2.** Residual charges on metal and O atoms based on the Bader charge analysis in ScO<sub>2</sub> and TiO<sub>3</sub>. The positive and negative values of  $\sigma$  represent the number of charges gained and lost by the atom.

The calculated formula for the convex hulls of formation enthalpy ( $\Delta E_f$ ) is defined as follows:

$$\Delta E_f(\text{MO}_x) = [E(\text{MO}_x) - E(\text{M}) - xE(\text{O})] / (1+x), \text{M}=\text{Sc, Ti}$$

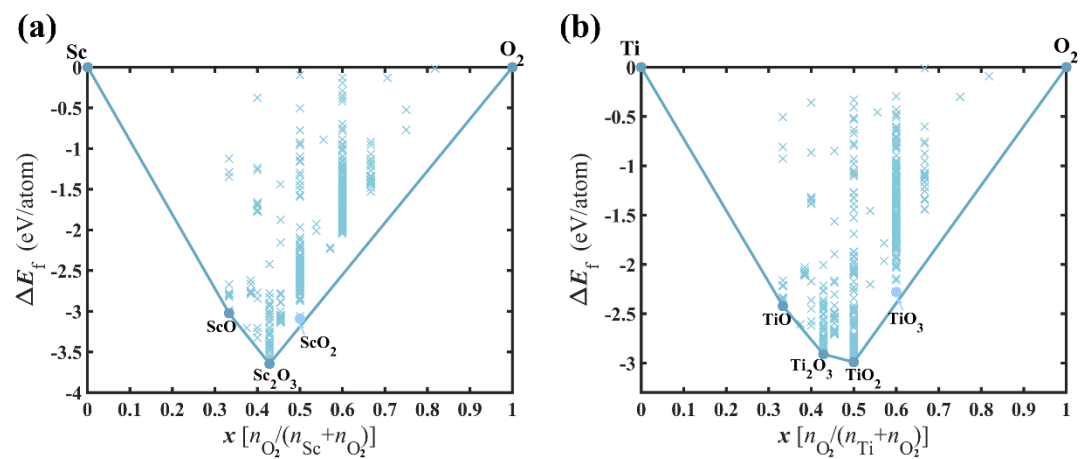

**Fig. S1.** (a), (b) The formation enthalpy of various Sc-O and Ti-O compounds.

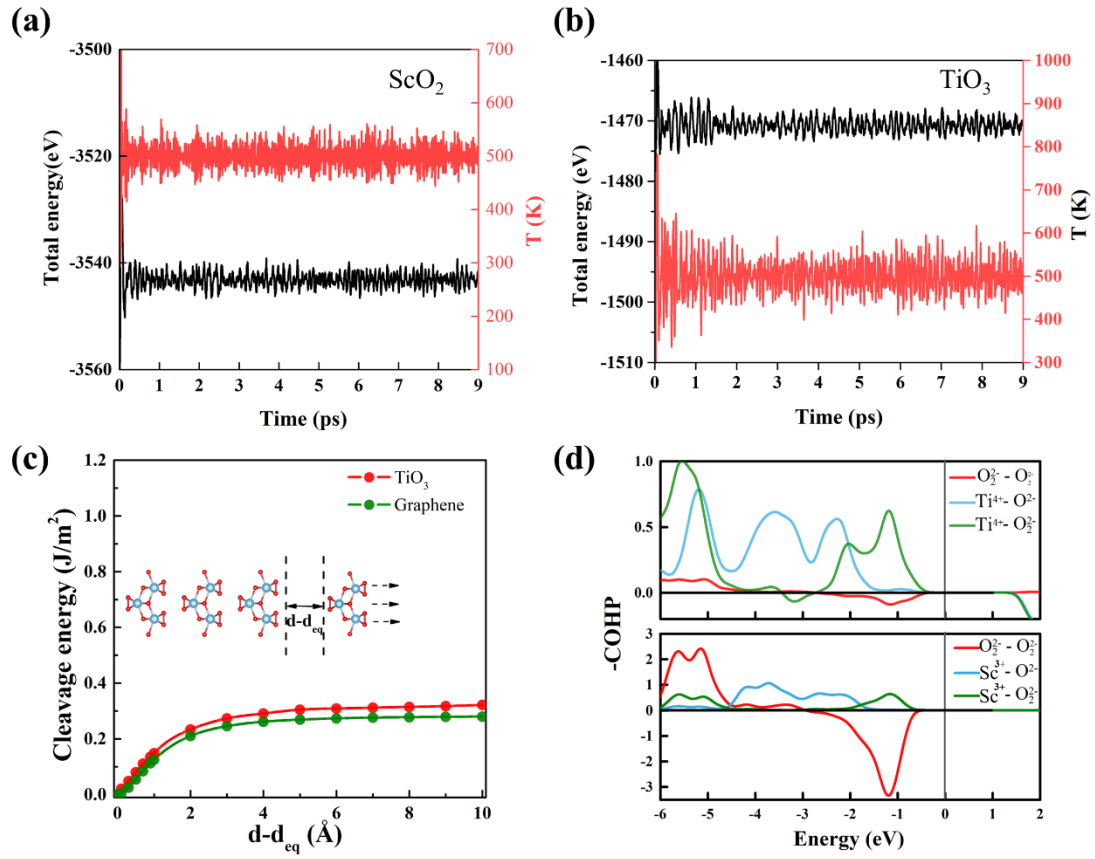

**Fig. S2** (a), (b) Fluctuations of total energy and temperature with respect to AIMD steps at 500 K for ScO<sub>2</sub> and TiO<sub>3</sub>. (c) Calculated cleavage energy of monolayer TiO<sub>3</sub> compared with the cleavage energy of monolayer graphene. (d) Negative crystal orbital Hamilton population (-COHP) of average  $O_2^{2-} - O_2^{2-}$ ,  $Ti^{4+} - O_2^{2-}$ ,  $Ti^{4+} - O_2^{2-}$ ,  $Sc^{3+} - O_2^{2-}$  and  $Sc^{3+} - O_2^{2-}$  bonds in the bulk ScO<sub>2</sub> and single layered TiO<sub>3</sub>.

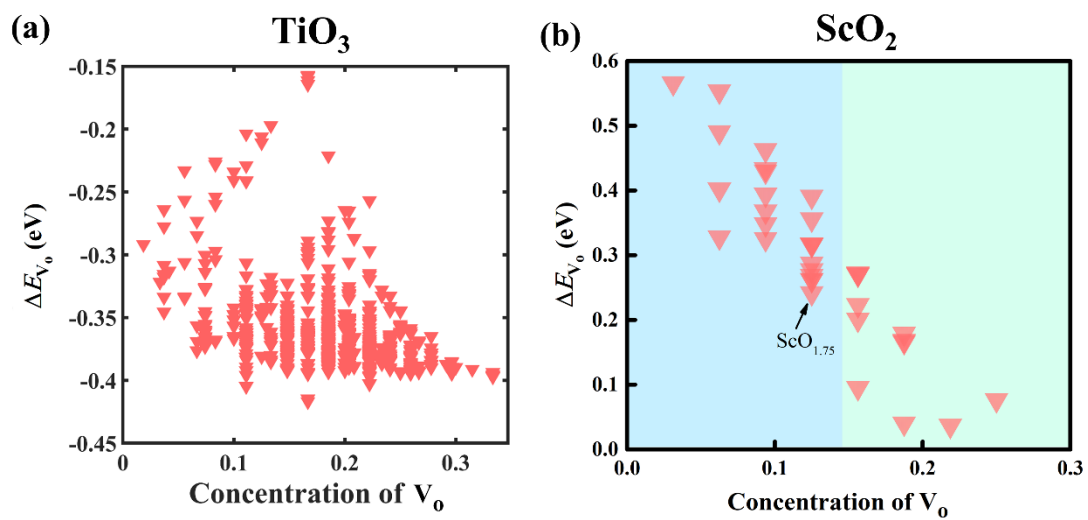

**Fig. S3** (a) The average formation energy  $\Delta E_{V_0}$  varies with oxygen vacancy concentration for the  $2 \times 2 \times 1$ ,  $\sqrt{5} \times \sqrt{5} \times 1$ , and  $3 \times 3 \times 1$  supercell of  $\text{TiO}_3$ . (b) The average formation energy  $\Delta E_{V_0}$  varies with oxygen vacancy concentration for  $2 \times 2 \times 1$  supercell of  $\text{ScO}_2$ . The right part indicates that the defect structure exhibits a higher degree of distortion.
